# Supplementary material for: The importance of tree demography and root water uptake for modelling the carbon and water cycles of Amazonia
Source: Copernicus journal article supplement (doi:10.5194/bg-2018-308), 2018-07-18
Supplement: Supplementary file [file bg-2018-308-AC2-supplement.pdf]

# Effect of tree demography and flexible root water uptake for modeling the carbon and water cycles of Amazonia

Emilie Joetzjer<sup>1,2</sup>, Fabienne Maignan<sup>1</sup>, Jérôme Chave<sup>2</sup>, Daniel Goll<sup>1</sup>, Ben Poulter<sup>3</sup>, Jonathan Barichivich<sup>1,4</sup>, Isabelle Maréchaux<sup>2,5</sup>, Sebastiaan Luyssaert<sup>1,6</sup>, Matthieu Guimberteau<sup>1,7</sup>, Kim Naudts<sup>1,8</sup>, Damien Bonal<sup>9</sup>, Philippe Ciais<sup>1</sup>

<sup>1</sup>Laboratoire des Sciences du Climat et de l'Environnement, LSCE-IPSL (CEA-CNRS-UVSQ), 91190 Gif-sur-Yvette, France

10 <sup>2</sup>Laboratoire Evolution et Diversité Biologique, UMR 5174, Université Paul Sabatier, CNRS, IRD, 31400 Toulouse, France

<sup>3</sup>NASA Goddard Space Flight Center, Biospheric Sciences Laboratory, Greenbelt, MD, USA

<sup>4</sup>Instituto de Conservación, Biodiversidad y Territorio, Universidad Austral de Chile, Valdivia, Chile, and Center for Climate and Resilience Research, Santiago, Chile

<sup>5</sup>AMAP, Université de Montpellier, IRD, CIRAD, CNRS, INRA, 34000 Montpellier, France

15 <sup>6</sup>Vrije Universiteit Amsterdam, Faculty of Science, 1081 HV, The Netherlands.

<sup>7</sup>UMR 7619 METIS, Sorbonne Universités, UPMC, CNRS, EPHE, 4 place Jussieu, 75005 Paris, France

<sup>8</sup>Max Planck Institute for Meteorology, Bundesstraße. 53, 20146 Hamburg, Germany

<sup>9</sup>Université de Lorraine, AgroParisTech, INRA, UMR Silva, 54000 Nancy, France

Correspondence to: [Emilie.joetzjer@lsce.ipsl.fr](mailto:Emilie.joetzjer@lsce.ipsl.fr)

## 20 Abstract.

Global Dynamic global vegetation models (DGVMs) part of the land surface schemes of Earth System Models do not represent forest structure and demography. Further, those models usually treat water uptake by plants from soil bucket schemes or multiple layers soil models, with non-physical water stress functions. This situation is a source of uncertainty for modelling the current state and future dynamics of Amazonian forest. We included recruitment processes and added a physically based model of soil water limitation on root water uptake for tropical evergreen forests in ORCHIDEE-CAN, a DGVM with demography equations previously established for temperate and boreal forests. The model was re-calibrated against tropical forest inventory measurements in Guyana and Brazil, including biomass-age relationships, diameter and height distributions. We compared the output of two model versions, one with forest demography only (CAN) and the other with demography and hydraulic transport of water from soil pores to roots coupled to xylem conduction by stems (CAN-RS). The results of the CAN and CAN-RS versions are compared with those of the standard TRUNK version of the DGVM used for global applications, which follows a big-leaf approximation, does not resolve forest demography and has a constant mortality applied to a well-mixed biomass pool. Site-level observations of turbulent energy and CO<sub>2</sub> fluxes at flux tower locations are used to evaluate the three versions of the model, as well as measurements of carbon stocks and stand density at inventory plots. Gridded observation-based models output of photosynthesis (GPP) and evapotranspiration (LE) are used across the Amazon basin. CAN and CAN-RS can reproduce observed forest structure variables, including tree density and height / diameters distribution, which were not modeled by TRUNK. In CAN-RS, water uptake from tree roots sustained from the deepest soil layers during the dry season, significantly improved the modeling of seasonal photosynthesis and evapotranspiration variations compared to CAN, especially over the Guyana and Brazilian shields with prevailing clay soils. The performances of CAN-RS are shown to be equivalent to those of TRUNK for carbon and water fluxes and carbon stocks across Amazonia, despite new processes being added. This result indicates that forest demography and mechanistic root water uptake did not degrade the DGVM performance while offering a more realistic simulation of key processes for the Amazon forest.

## 1 Introduction

Despite the importance of the Amazonian rainforests for global climate [Eltahir and Bras, 1994; Werth and Avissar, 2002] large uncertainties impede the production of robust future projections of changes in net carbon uptake over Amazonia [Poulter et al., 2010; Arora et al., 2013; Jones et al., 2013]. An analysis of variance on simulation outputs from 12 Earth System models (ESM) showed that uncertainties in projections of terrestrial carbon uptake are primarily driven by model structure [Lovenduski and Bonan, 2017]. These uncertainties arise from both the atmospheric [Ahlström et al., 2012] and the land surface components [Booth et al., 2012; Sitch et al., 2015]. In land models (dynamic global vegetation models, or DGVMs) large sources of uncertainty include the vegetation response to droughts [Restrepo-Coupe et al., 2016], and tree demographic processes [Fisher et al., 2010; Rödiger et al., 2018]. Most DGVMs simulate the effect of water shortage on plant functioning by lowering leaf gas exchange rates using a multiplicative water stress factor that depends on soil moisture [Christoffersen et al., 2014] and by including atmospheric water stress from increased vapour pressure deficit in their parameterization of stomatal conductance. With this simplification, models typically fail to capture tropical carbon and water flux seasonality [Poulter et al., 2009; Restrepo-Coupe et al., 2016], and vegetation response to drought [Powell et al., 2013; Joetzjer et al., 2014]. A few global DGVMs have recently adopted a more explicit representation of the soil-plant-atmosphere water column [Bonan et al., 2014; Christoffersen et al., 2014; Xu et al., 2016], but much research is still needed to fully model these processes.

In most DGVMs, water availability in the root zone is quantified using the root biomass-weighted or root profile-weighted sum of soil layer moisture. Yet, this model structure overlooks the observation that soil-to-root water flow depends on soil and root hydraulic properties, which vary in time and space [Sperry et al., 2002]. A prevailing assumption is that the upper soil layers, with higher root biomass, contribute more to soil water uptake. This however overlooks the fact that tree water potentials preferentially equilibrate with the wettest part of the soil [Schmidhalter, 1997], a process controlled not only by the density of roots but also by the soil-to-root resistance. In turn, the soil-to-root resistance is non-linearly related to soil water content [Gardner, 1960]. Overall, this approach leads to an overestimation of the water stress experienced by trees. We evaluated the effect of representing layer-to-layer heterogeneity of soil water availability for trees and test if this process improves DGVMs carbon and water fluxes representation. Besides, first-generation DGVMs that are based on a spatially aggregated hypothesis, also called “big-leaf” models, are progressively being superseded by second generation DGVMs (2gDGVM). This new generation of models is partly inspired by individual plant-based and forest stand models (e.g., [Fyllas et al., 2014; Fischer et al., 2016; Maréchaux and Chave, 2017]), and they explicitly represent forest dynamics via tree demography (cohort-based) and vertical competition for light. There are several approaches to represent tree demography in models. In some models forest structure and tree demography emerge from a mechanistic representation of competition and recruitment schemes with different species or groups of species having different functional traits. This method has given insights on tropical forests dynamics and resilience [Zhang et al., 2015; Levine et al., 2016; Xu et al., 2016; Fisher et al., 2018]. However they come with complex parameterizations, high computational cost and are not practical to run at global scale. In this study, we propose to evaluate and test the benefit of an intermediate complexity second generation DGVM that represents demography and forest structure by downscaling NPP into several size classes and simulating mortality from tree density exceeding a threshold by killing preferentially a fraction of the smaller size classes, based on self-thinning principles. Self-thinning is here parameterized but has been observed as an emerging property in tropical stands [Pillet et al., 2017].

This study explores the importance of tree demographic and below-ground hydraulic processes on the Amazonian carbon

and water cycles, by testing the performances of three versions of the same model: the ORCHIDEE DGVM (Organizing Carbon and Hydrology in Dynamic Ecosystems). As a reference version, we used the TRUNK version updated for the CMIP6 exercise (Peylin et al., *in prep*) and widely used in global carbon cycle studies. TRUNK is based on Krinner et al. (2005) uses a “big-leaf” approximation, and simulates biomass dynamics from the allocation of NPP to leaves, wood and roots with a constant mortality. A single well-mixed pool thus describes woody biomass in the TRUNK. Water uptake by roots in TRUNK is calculated by weighting a static root profile discretized upon 11 soil layers by soil moisture in each layer. CAN has the same photosynthesis model than TRUNK but includes a simplified forest demography model with 20 diameter classes upon which stand level GPP is distributed unevenly to favour high diameters, and mortality being the result of light competition (self-thinning). CAN-RS is equal to CAN but has a new root water uptake model described in this study.

We evaluated (1) the effect of representing layer-to-layer heterogeneity of soil water availability for trees and test if this process improves DGVMs carbon and water fluxes representation by comparing CAN-RS and CAN (2) the effect of representing demography and forest structure by distributing NPP into several classes of diameter, including self-thinning mortality and recruitment by comparing CAN and TRUNK and (3) the combined effect of including layer-to-layer heterogeneity of soil water and forest demography by comparing CAN-RS with TRUNK. By comparing simulations by these three versions over Amazonia against forest inventory data for biomass and stand characteristics, local site level flux tower measurements of carbon and latent heat exchange, and regional water and carbon fluxes and stocks observation-based models, our results shed light on critical processes whose explicit representation would help to improve the performance of 2gDGVMs in general, and CAN in particular, and enhance their predictive ability on the fate of the largest tropical forest on Earth.

## 2. Methods

### 2.1 Model description and experimental design

#### 2.1.1 General model description

ORCHIDEE is a process-based ecosystem model first described by Krinner et al., [2005]. It represents energy, water, and carbon exchanges within the soil-plant-atmosphere continuum using a big-leaf approach. Carbon assimilation is based on the leaf-scale equation of Farquhar et al., [1980] for C3 plants and is assumed to scale from leaf to canopy with APAR (absorbed photosynthetically active radiation) decreasing exponentially with leaf area index (LAI), according to the big-leaf approximation. Stomatal conductance is proportional to the product of net CO<sub>2</sub> assimilation with atmospheric relative humidity divided by atmospheric CO<sub>2</sub> concentration in the canopy [Ball et al., 1987]. Evapotranspiration (ET) is the sum of evaporation from bare soil, evaporation of water intercepted by the canopy, and transpiration. Transpiration is controlled by the stomatal conductance, which is modelled as a function of water availability in the soil column and of a fixed root density profile [de Rosnay and Polcher, 1998] (see SI section D).

The CAN version of ORCHIDEE [Naudts et al., 2015; McGrath et al., 2016] replaced the big-leaf approach by a dynamic three-dimensional representation of the forest canopy. Forest tree demography, including recruitment, is simulated by distributing stand-level net primary productivity (NPP) to a user-defined number of diameter classes following the size-dependent allocation rule of Deleuze et al., [2004], as originally implemented by Bellassen et al., [2010]. Mortality due to competition is based on a relationship between biomass and diameter, i.e., self-thinning [Reineke, 1933]. This has been widely reported for temperate and boreal forests, but it has also been observed, albeit with a larger noise, in humid tropical forests [Kohyama, 1992; Phillips et al., 2002; Pillet et al., 2017]. Additionally, because actual transpiration is limited by the amount of water the plant can transport from the soil to its leaves, transpiration is calculated as a function of the ratio of the water potential difference between soil and leaves. This procedure accounts for the total hydraulic resistance of the water

pathway from roots to sapwood and leaves, described by *Hickler et al.*, [2006] and *Naudts et al.*, [2015]. CAN was originally parameterized and evaluated for mid-latitude forests [*Naudts et al.*, 2015]. The main adaptations made to CAN for tropical forests are presented below, with minor changes listed in the Supplementary Information.

### 5 2.1.2 ORCHIDEE-CAN: self-thinning and recruitment scheme

In CAN, competition for light among trees is simulated through self-thinning. The maximum number of trees ( $N_{max}$ ) depends on the mean stand diameter ( $D_g$  (m)), Fig. 1a) as follows:

$$N_{max} = \left(\frac{D_g}{\alpha}\right)^{1/\beta} \quad (1)$$

with the parameters  $\alpha = 1100$  (m) and  $\beta = -0.57$  estimated for tropical forests using publicly available plot-level data from the RAINFOR forest inventory network [*Brienen et al.*, 2015].

In unmanaged tropical forests, the mortality of old trees takes place in parallel with the recruitment of young trees. To account for this natural plant regeneration, we implemented a recruitment scheme where the number of recruited trees ( $N_{recruits}$  per hectare and per year, Fig. 1b) is a function of the LAI using the following equation:

$$N_{recruits} = 100 \exp(-0.15 LAI) \quad (2)$$

This parameterization assumes that the number of recruits depends on mean-stand LAI.

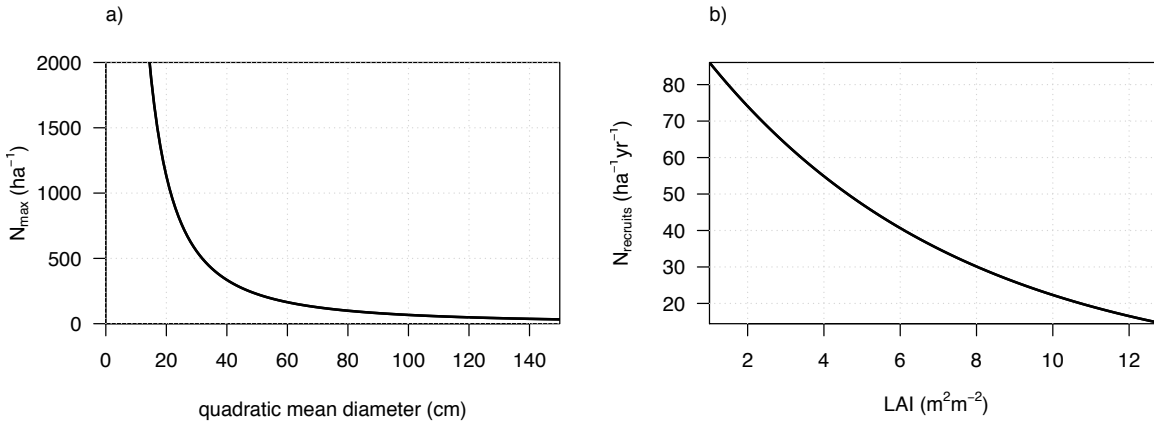

**Figure 1. (a) self-thinning equation and (b) recruitment scheme for tropical forests in CAN**

### 2.1.3 Implementing a dynamic root scheme

In CAN, the soil water potential in the rooting zone ( $\Psi_{rz}$ , MPa) is calculated as the weighted sum of the soil water potential per layer ( $\Psi_s$ , MPa), weighted by the relative proportion of root biomass in each layer  $d_{root}$ . An additive tuning factor ( $m_\psi$ ) accounts for missing processes, such as the hydraulic resistance at the soil-root interface [*Naudts et al.*, 2015] :

$$\Psi_{rz} = \sum_{l=1}^L [\Psi_s(l) d_{root}(l)] + m_{\psi} \quad (3)$$

where  $L$  is the number of layers ( $L=12$ ) and  $l$  the index of the layer considered.

- 5  $\Psi_s$  is calculated for each soil layer  $l$  and depends on the layer volumetric water content ( $\theta(l) \text{ m}^3 \text{ m}^{-3}$ ) following the Mualem - van Genuchten model [Mualem, 1976; van Genuchten, 1980]:

$$\Psi_s(l) = \max\left(\frac{1}{k_{av}} \left( \left( \frac{SWC(l) - \theta_r}{\theta_r - \theta_s} \right)^{-\frac{1}{k_{mv}}} - 1 \right)^{\frac{1}{k_{nv}}}; -5\right) \quad (4)$$

- 10 where  $SWC(l)$  is soil water content in layer  $l$ ;  $\theta_r$  and  $\theta_s$  ( $\text{m}^3 \text{ m}^{-3}$ ) are the residual and saturated SWC, respectively; and  $k_{av}$ ,  $k_{mv}$  and  $k_{nv}$  are the van Genuchten parameters. These parameters are texture-dependent (see Table S1).  $\Psi_s$  cannot be lower than the soil water potential for hygroscopic water (-5 MPa) [Larcher, 2003].

- The use of root biomass-weighted sum of soil layer moisture in Eq. (3) ignores the dependence of soil-to-root water flow on soil and root hydraulic properties. Besides, the use of  $m_{\psi}$  often leads to incorrect positive hydraulic potentials. We therefore implemented a different computation of  $\Psi_{rz}$ , whereby  $\Psi_s$  is weighted by  $E_{max}(l)$ , the maximum amount of water ( $\text{mmol m}^2 \text{ s}^{-1}$ ) that can be absorbed by the roots in each layer, which itself depends on the soil-to-root resistance  $R_{sr}$  ( $\text{MPa s mmol}^{-1} \text{ m}^{-2}$ ) and on a minimum root water potential  $\Psi_{root,m}$  (MPa) [Williams et al., 2001; Fisher et al., 2006; Duursma and Medlyn, 2012]. Replacing Eq. (3) by the following equation in CAN leads to the version hereafter called CAN-RS.

$$\Psi_{rz} = \frac{\sum_1^L \Psi_s(l) E_{max}(l)}{\sum_1^L E_{max}(l)} \text{ with } E_{max}(l) = [\Psi_s(l) - \Psi_{root,m}] / R_{sr}(l) \quad (5)$$

$\Psi_{root,m}$  is a parameter set at -3 MPa [Duursma and Medlyn, 2012]. The soil-to-root resistance  $R_{sr}$  estimates the effective pathlength for water transport from the soil matrix to the root surface [Gardner, 1960], and is computed as follows:

$$R_{sr}(l) = \frac{\ln\left(\frac{r_s(l)}{r_r}\right)}{2 \pi l_r(l) G_{soil}(l) \Delta D(l)} \quad (6)$$

Here,  $l_r$  ( $\text{m}^{-2}$ ) is the root length per unit of soil volume, and is a function of the specific root length (SRL), with SRL set at  $10 \text{ m g}^{-1}$  [Metcalf et al., 2008], and of the fine root biomass density per layer ( $Biomass_{roots}(l)$ , in  $\text{g m}^{-3}$ ):  $l_r(l) = Biomass_{roots}(l) \text{ SRL}$ ;  $r_s$  (m) is one-half of the mean distance between roots, computed following [Newman, 1969]:

$$r_s = \left( \frac{1}{\pi l_r(l)} \right)^{0.5} \quad (7)$$

- and  $r_r$  (m) is the mean fine root radius, set at  $0.29 \cdot 10^{-3} \text{ m}$  [Bonan et al., 2014];  $G_{soil}$  ( $\text{mmol m}^{-1} \text{ s}^{-1} \text{ MPa}^{-1}$ ) is the saturated hydraulic conductivity for the soil (see section 2.1.3). In CAN,  $Biomass_{roots}$  represents the sum of fine root biomass of all the cohorts calculated following the allocation scheme relying on the pipe model theory [Shinozaki, 1964; Sitch et al., 2003] and it is vertically discretized per soil layer by multiplying by  $d_{root}(l)$ .

### 2.1.3 Soil characteristics

In all three versions of ORCHIDEE considered in this study, the relationships between saturated hydraulic conductivity, volumetric water content, and matrix potential are described by the Mualem–van Genuchten model [Mualem, 1976; van Genuchten, 1980], using the parameters estimated by Carsel and Parrish, [1988] for the 12 soil texture classes of the United States Department of Agriculture (USDA) classification.

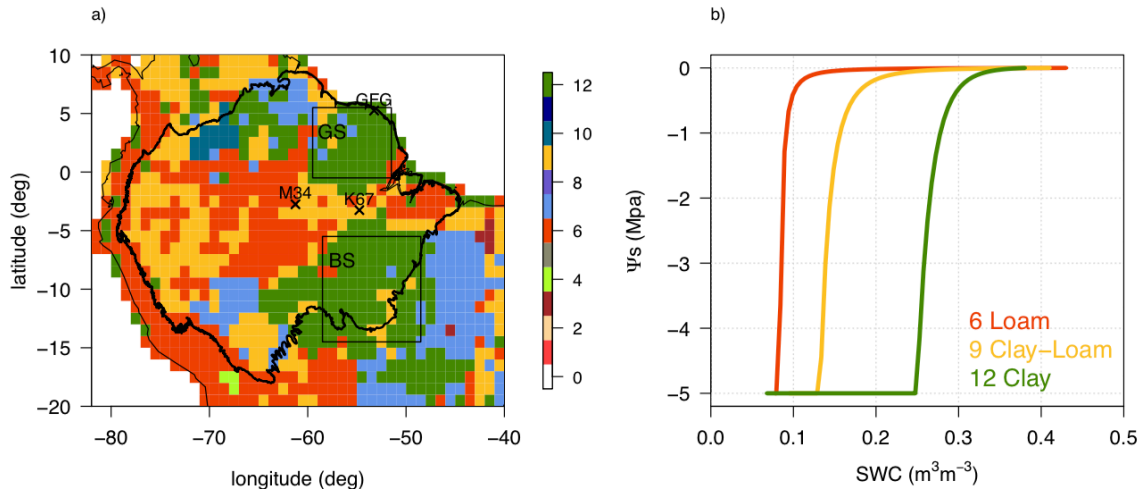

**Figure 2. (a) USDA soil types interpolated at 1-degree resolution over the Amazon used as a forcing to ORCHIDEE, where GS and BS squares represent the Guianan and Brazilian Shields respectively; and (b) the soil water retention curves ( $\Psi_s$  versus SWC) predicted by the Mualem-van Genuchten equation (Eq. 4) for the three dominant USDA soil classes in Amazonia. Parameter values are given in the SI (Table S1).**

The spatial heterogeneity of soil structure in Amazonia is related to the geology of the area with old, highly weathered soils (Precambrian substrates) over the Brazilian and Guianan Shields contrasting with the much younger Cenozoic geology of the Andes and western Amazonia [Quesada *et al.*, 2011]. This is reflected in the USDA map of soil types, with mainly clayey (12) soil type over the shields, and loam (6) and clay-loam (9) over the rest of Amazonia (Fig. 2a). The Mualem-van Genuchten equation (Eq. 4) implies lower water availability for plants in clayey soils than for those in loam or clay-loam soils, at a given soil water content (i.e., more negative values  $\Psi_s$  for the same SWC; Fig. 2b).

#### 2.1.4 Simulations

To investigate the effect of both hydraulic processes and model structure on the simulated forest dynamics of Amazonia, we compared outputs from the TRUNK version as used in the Sixth Model Intercomparison Project (CMIP6), the CAN (v2290) version parameterized for tropical forests, and CAN-RS. All three versions were run using 13 plant functional types (PFTs) and the multi-layer diffusion scheme [de Rosnay *et al.*, 2002] considering a 4-metre soil depth and 12 soil layers [Campoy *et al.*, 2013].

Firstly, simulations were performed at three sites across Brazil and French Guiana for which eddy-covariance measurements were available (da Rocha, 2004): Santarem KM67 (K67), Manaus KM34 (M34) [da Rocha *et al.*, 2009] and Paracou (GFG) [Bonal *et al.*, 2008]. The evergreen tropical forest PFT cover was used. All simulations used hourly local meteorological forcing. Each site corresponds to one of the major soil texture classes according to USDA soil classification (Fig. 2 and Table 1). Secondly, regional historical simulations were performed at 1-degree spatial resolution over the Amazonian forest using up-scaled gridded climate forcing data from CRUNCEP, which combine monthly data from the Climate Research Unit

(CRU) and 6-hourly fields from the National Center for Environmental Prediction (NCEP) [Wei *et al.*, 2014] (Table 1). All simulations started from a semi-analytical spin-up [Lardy *et al.*, 2011] to equilibrate carbon and hydrological variables by recycling climate data from 1981 to 2000 under a constant CO<sub>2</sub> concentration set to 350 ppm.

5 **Table 1. Summary of the simulations. All four simulations were run with the TRUNK, CAN and CAN-RS versions.**

|                 | Simulation name | Soil type                  | USDA | Meteorological data                          | Period    |
|-----------------|-----------------|----------------------------|------|----------------------------------------------|-----------|
| <b>local</b>    | K67             | clay-loam                  | 9    | In situ meteorological measurements (hourly) | 2002-2004 |
|                 | M34             | loam                       | 6    |                                              | 2003-2005 |
|                 | GFG             | clay                       | 12   |                                              | 2007-2009 |
| <b>regional</b> | REGIONAL        | USDA texture maps (Fig. 2) |      | CRU-NCEPv7.1 (6 hourly)                      | 1981-2016 |

## 2.2 Observations used as benchmarks

### 2.2.1 Site data

- At all three tropical forests sites [Bonal *et al.*, 2008; da Rocha *et al.*, 2009], measurements include hourly turbulent sensible (H) and latent (LE) heat fluxes, and net ecosystem carbon exchange (NEE) made using the eddy-covariance technique [Shuttleworth *et al.*, 1984; Baldocchi *et al.*, 2001]. Gross primary productivity (GPP) and ecosystem respiration were retrieved from NEE using the algorithm of Reichstein *et al.*, [2005]. Flux data are noisy, and Hollinger and Richardson, [2005] evaluated the relative uncertainty of H, LE and CO<sub>2</sub> fluxes derived from eddy-covariance measurements to be around 25% for a temperate site. For eddy-covariance data, energy balance closure is a good proxy for data quality [Wilson, 2002]. We therefore calculated the overall energy balance ratio as the ratio of the sum of outgoing radiation (LE + H) divided by the sum of incoming radiation averaged over the study period [Wilson, 2002]. K67 and GFG showed a consistent energy closure (ratio of 1.008 and 0.96 respectively), but at M34 energy fluxes should be interpreted carefully as energy closure was not achieved (ratio of 0.69).
- Reported LAI, basal area (BA), and canopy height, (references in Table 2), were used to benchmark the site-level simulations. At K67, a vertical soil moisture profile was available [Nepstad *et al.*, 2007] and used to test the soil water temporal dynamics in the CAN-RS version. At GFG, old-growth forest plots were surveyed [Gourlet-Fleury *et al.*, 2004; Ho Tong Minh *et al.*, 2016]. We used tree diameter and height measurements (for 1592 trees) from the 2014 inventory on a 6.25 ha plot in order to evaluate CAN and CAN-RS forest structure representation. Forest inventories used in this study only included trees measured above a DBH of 10 cm. Data from a site near to GFG that had been clear-cut in 1976 and then left to regenerate were also used to evaluate forest regeneration in CAN and CAN-RS [Chave *et al.*, in prep].

### 2.2.2 Regional datasets

- To evaluate GPP patterns and seasonality at regional scale, we used the monthly global observation-based GPP model FLUXCOM, running from 1981 to 2013 and produced at 0.5° resolution using different methods by Tramontana *et al.*, [2016] and Jung *et al.*, [2017]. We calculated the median of the following three methods, namely ANNs (artificial neural networks), RF (Random Forest) and MTE (Model Tree Ensemble) and chose the method proposed by Lasslop *et al.*, [2010] to retrieve GPP by fitting a respiration model to nighttime NEE values. All methods were highly consistent (not shown). Compared to the global network of flux-tower measurements, performances were reasonable in terms of annual mean and spatial pattern representation ( $R^2 > 0.7$ ) and mean seasonal cycle ( $0.67 < R^2 < 0.77$ ), but they showed a low predictive power

for inter-annual variability [Tramontana *et al.*, 2016]. Also, GPP (and other fluxes) were better predicted in temperate climate sites than in the tropics due to a smaller amount of training data being available [Tramontana *et al.*, 2016].

For ET, we used the remotely sensed GLEAM v3.1a product [Martens *et al.*, 2017 and references within] interpolated at 1-degree resolution from 1981 to 2016. To illustrate the uncertainties associated with this global dataset, GLEAMv3.1 was compared to the ET measurement at K67 (M34) between 2000 and 2006, Moreira *et al.*, [2018] found a relatively strong bias of 0.77 (0.99) mm d<sup>-1</sup> and low correlation -0.08 (0.32).

Furthermore, we used a compilation of 413 ground inventories across Amazonia presented by Mitchard *et al.*, [2014]. Basal area (BA) was directly calculated from diameter measurements, and aboveground biomass (AGB) was retrieved using the three-parameter moist tropical forest allometric model of Chave *et al.*, [2005].

### 3. Results

#### 3.1 Site-level evaluation of the models

While TRUNK has been evaluated over Amazonia [Guimberteau *et al.*, 2012, 2014; Getirana *et al.*, 2014], CAN has been evaluated for European forests only. All three model versions (TRUNK, CAN and CAN-RS) predicted the yearly mean state of forest features (such as LE, GPP, LAI) with a bias < 20% at the three test sites (Table 2). CAN and CAN-RS predicted more productive forests with higher biomass (higher LE, GPP, AGB, LAI) than TRUNK. At M34, CAN and CAN-RS overestimated LE, but the energy budget was not closed at this site (see Methods). TRUNK simulated an AGB lower than the observed one, and CAN and CAN-RS generally overestimated AGB, especially at K67, where the overestimate by CAN and CAN-RS was 25% and 31%, respectively. This overestimation of AGB may possibly result from recent disturbances [Pyle *et al.*, 2008] that the models did not take into account. Finally, CAN and CAN-RS tended to underestimate tree height and overestimate basal area (Table 2).

**Table 2. Comparison of TRUNK, CAN and CAN-RS against observations made at K67, M34 and GFG. Mean percentage bias between the observations and model results are highlighted in green when < 20%, in blue when between 20 to 40% and in red when > 40%.**

| VARIABLE                                                                | Site | OBS        | TRUNK | CAN | CAN-RS | Refs and remarks                                                                         |
|-------------------------------------------------------------------------|------|------------|-------|-----|--------|------------------------------------------------------------------------------------------|
| <b>LE</b><br>(W m <sup>-2</sup> )                                       | K67  | 86         | 70    | 87  | 89     | Eddy-covariance measurements [Bonal <i>et al.</i> , 2008; da Rocha <i>et al.</i> , 2009] |
|                                                                         | M34  | 79         | 91    | 132 | 131    |                                                                                          |
|                                                                         | GFG  | 119        | 92    | 102 | 115    |                                                                                          |
| <b>GPP</b><br>(μmol CO <sub>2</sub><br>m <sup>2</sup> s <sup>-1</sup> ) | K67  | 8.2        | 7.7   | 6.3 | 7.4    |                                                                                          |
|                                                                         | M34  | 7.9        | 7.5   | 8.1 | 8.1    |                                                                                          |
|                                                                         | GFG  | 9.7        | 7.6   | 7.8 | 9.6    |                                                                                          |
| <b>AGB</b><br>(tC ha <sup>-1</sup> )                                    | K67  | 148 ± 3    | 101   | 198 | 214    | [Pyle <i>et al.</i> , 2008] recently disturbed plot                                      |
|                                                                         | M34  | 180 ± 10   | 99    | 221 | 221    | [Malhi <i>et al.</i> , 2009b]                                                            |
|                                                                         | GFG  | 203        | 102   | 206 | 228    | [Dubois-Fernandez <i>et al.</i> , 2012]                                                  |
| <b>LAI</b><br>(m <sup>2</sup> m <sup>-2</sup> )                         | K67  | 6.4 ± 0.1  | 4.9   | 6.2 | 6.6    | [Malhi <i>et al.</i> , 2009a]                                                            |
|                                                                         | M34  | 5.6 ± 0.2  | 4.8   | 6.7 | 6.7    | [Malhi <i>et al.</i> , 2009a]                                                            |
|                                                                         | GFG  | 8.6 ± 0.7  | 5.0   | 6.5 | 7.3    | [Granier <i>et al.</i> , 1996]                                                           |
| <b>Canopy</b>                                                           | K67  | 29.1 ± 7.2 | -     | 19  | 19.1   | [Meyer <i>et al.</i> , 2018] (Fig. S3) mean canopy height                                |



|                                                         |     |            |  |      |      |                                                                            |
|---------------------------------------------------------|-----|------------|--|------|------|----------------------------------------------------------------------------|
| <b>Height</b><br>(m)                                    | M34 | 26.7 ± 6.8 |  | 19.5 | 19.6 | model (CHM) at 1 m resolution from LIDAR and associated standard deviation |
|                                                         | GFG | 29.7 ± 9.5 |  | 19.4 | 20.2 |                                                                            |
| <b>Basal Area</b><br>(m <sup>2</sup> ha <sup>-1</sup> ) | K67 | 31         |  | 36.1 | 36.2 | [Hunter et al., 2008]                                                      |
|                                                         | M34 | 27         |  | 36.6 | 36.6 | [Rodrigues et al., 2001]                                                   |
|                                                         | GFG | 31.6       |  | 36.5 | 37.3 | [Ferry et al., 2006] (Table 4)                                             |

**3.1.1 Seasonal water and carbon fluxes**

Looking at the time series of LE, GPP and NEE at the three sites, the three model versions displayed reasonable scores with temporal correlations between observations and simulations varying from 0.6 to 0.8; the normalized standard deviation and RMSE ranked from 0.5 to 1 (Fig. 3). CAN-RS outperformed CAN at two of the sites for three metrics displayed in the Taylor diagram, K67 and GFG, but not at M34 where the two models had a similar performance (Fig. 3).

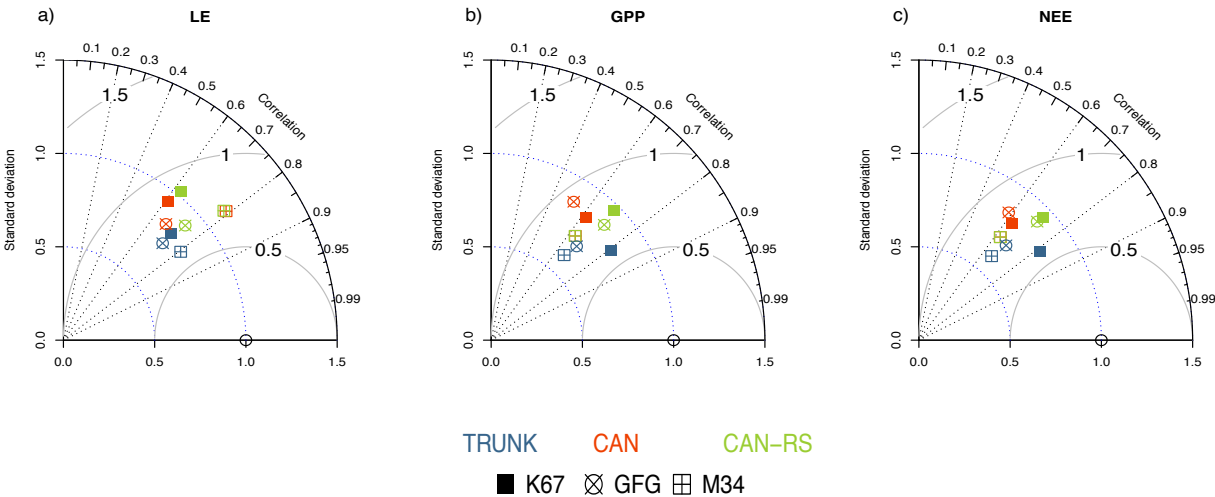

**Figure 3. Taylor Diagrams [Taylor, 2001] for: (a) LE, (b) GPP and (c) NEE, at three Amazonian sites equipped with a eddy-flux tower systems. These quantities were calculated among hourly values removing nighttime values (defined by downwelling shortwave radiation  $\leq 5 \text{ W m}^{-2}$ ). In a Taylor diagram, equal correlation extends radially from the origin. The blue concentric lines indicate identical ratios of standard deviation of the simulated flux to the observed flux. The grey lines represent identical root mean square errors (RMSE) of the centred fluxes.**

The effect of the soil-to-root resistance-weighting scheme on LE and GPP was strongly influenced by the soil type (Table 1 and Fig. 2). Little difference between CAN and CAN-RS was observed at site M34, because there, the soil is loamy, implying a low water stress most of the year. At site GFG however, soil is clayey implying a high water stress during the dry season, and CAN-RS performed better than CAN, which underestimated LE and GPP by about 31% and 54%, respectively, during the dry season. For site K67 with a clayey-loamy soil, implying an intermediate water stress, CAN-RS buffered the dry season drop in LE and GPP simulated by CAN during the first (2002) and third years (2004). In 2003, CAN-RS simulated a decrease in LE and GPP two months sooner than CAN (Figs. 4 and 5). CAN-RS better simulated the flux seasonality compared to CAN for soils prone to water stress during the dry season, by buffering the effect of drought stress.

CAN-RS performance was comparable to TRUNK with, at daily time-steps, a better representation of the variability for all fluxes, but slightly lower correlations for carbon fluxes (Fig. 3). CAN-RS simulated a midday depression for GPP during dry seasons, which is not apparent in the data, resulting in a lower correlation between observations and simulations than for the TRUNK version (Fig. 4).

5

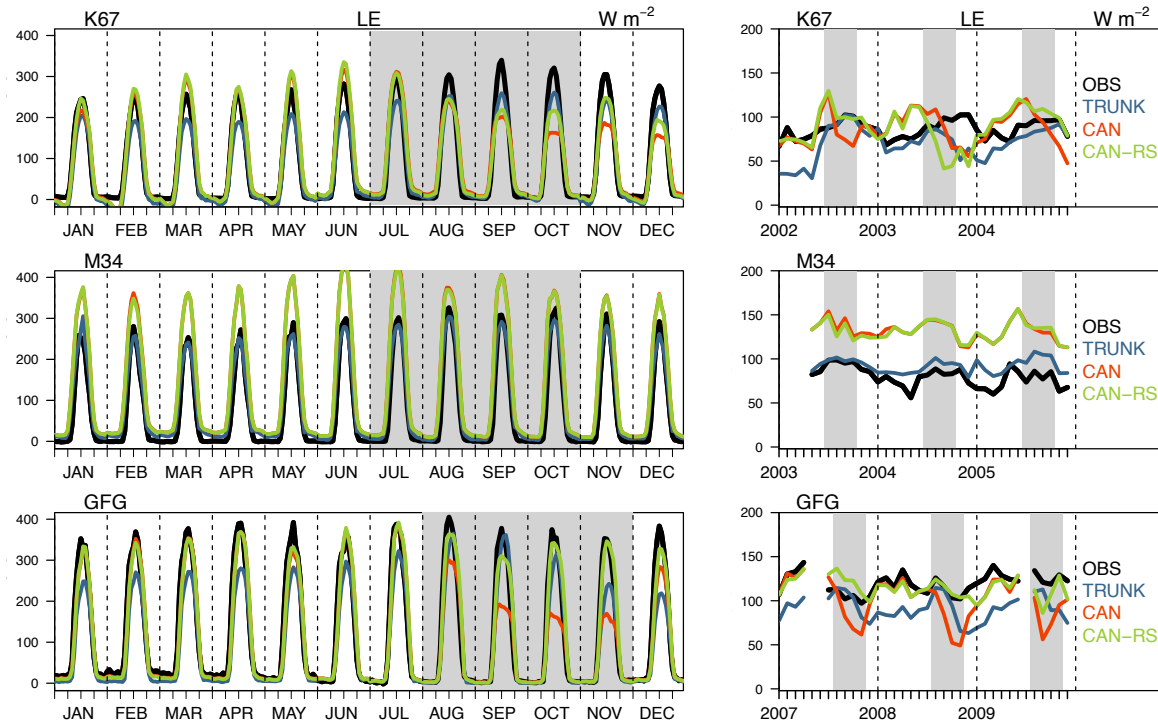

**Figure 4.** Observed and simulated LE ( $\text{W m}^{-2}$ ) at the three sites. Left panels show the average diurnal cycle for each month over three years; and right panels, monthly mean time series. Grey shaded areas indicate dry seasons (here defined as periods with precipitation less than 100 mm per month).

10

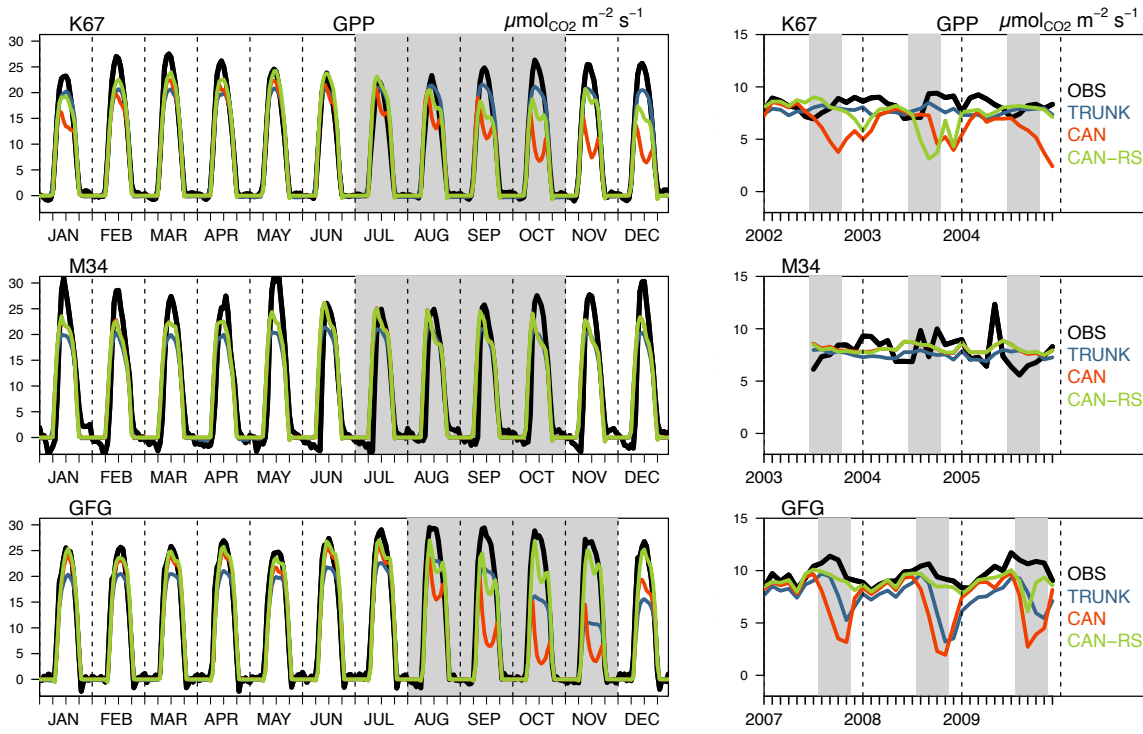

**Figure 5. Observed and simulated GPP ( $\mu\text{molCO}_2 \text{ m}^{-2} \text{ s}^{-1}$ ) at the three sites. Left panels show the average composite monthly diurnal cycle for each month over 3 years; and right panels, monthly mean time series. Grey shaded areas indicate dry seasons (here defined as periods with precipitation less than 100 mm per month).**

5

### 3.1.2 Soil volumetric water content and transpiration

To better understand the effect of the new root water uptake scheme, we focus here on the K67 site, where direct observations of the variation of soil water content with depth are available. Deviations between observations and simulations may be due to using soil texture and van Genuchten parameters from the USDA soil parameterization — these might deviate from actual soil at K67 (Figs. 6b-d). Besides, soil water content tended to be lower in CAN-RS than in CAN, especially during the dry seasons, in agreement with a higher LE simulated by CAN-RS (Fig. 4).

For the years 2002 and 2004, the soil-to-root resistance scheme implemented in the multilayer soil model allowed CAN-RS to overcome the too strong tree water stress simulated by CAN during dry seasons (Figs. 4 and 5) and  $\Psi_{rz}$  stayed close to zero (Fig. 6e). Wet season rainfall restocked soil layers with water from top to bottom (Fig. 6d), and most layers then contributed to the transpiration flux (Fig. 6f). As the dry season progressed, the topsoil layers became drier due to stronger evaporation and harsher root competition, which induced a shift of water uptake towards deeper and wetter soil layers (Fig. 6f), where the soil-to-root resistance was lower (Eq. 6) and  $E_{\max}$  higher (Eq. 7). Since the 2003 wet season was drier (1276 mm) than the ones in 2002 (1683 mm) and 2004 (1849 mm) (Fig. 6a), the amount of precipitation was insufficient to recharge the soil after dry-season depletion in the model (Fig. 6c-d) but not in the observations (Fig. 6b) explaining the mismatch between the observed and simulated fluxes (Fig 4 and 5). This too slow recharge of the soil in the wet season may be due to underestimated vertical infiltration (e.g. ignored soil conductivity increased by roots in weathered tropical soils) or to the lack of groundwater storage mechanisms. This translates into strong hydrological stress during the 2003 dry season,

with daily  $\Psi_{rz}$  reaching -2.3 MPa (Fig. 6e). This failure to completely recharge the soil profile caused a significant reduction in the simulated LE and GPP in 2003 (Figs. 4 and 5).

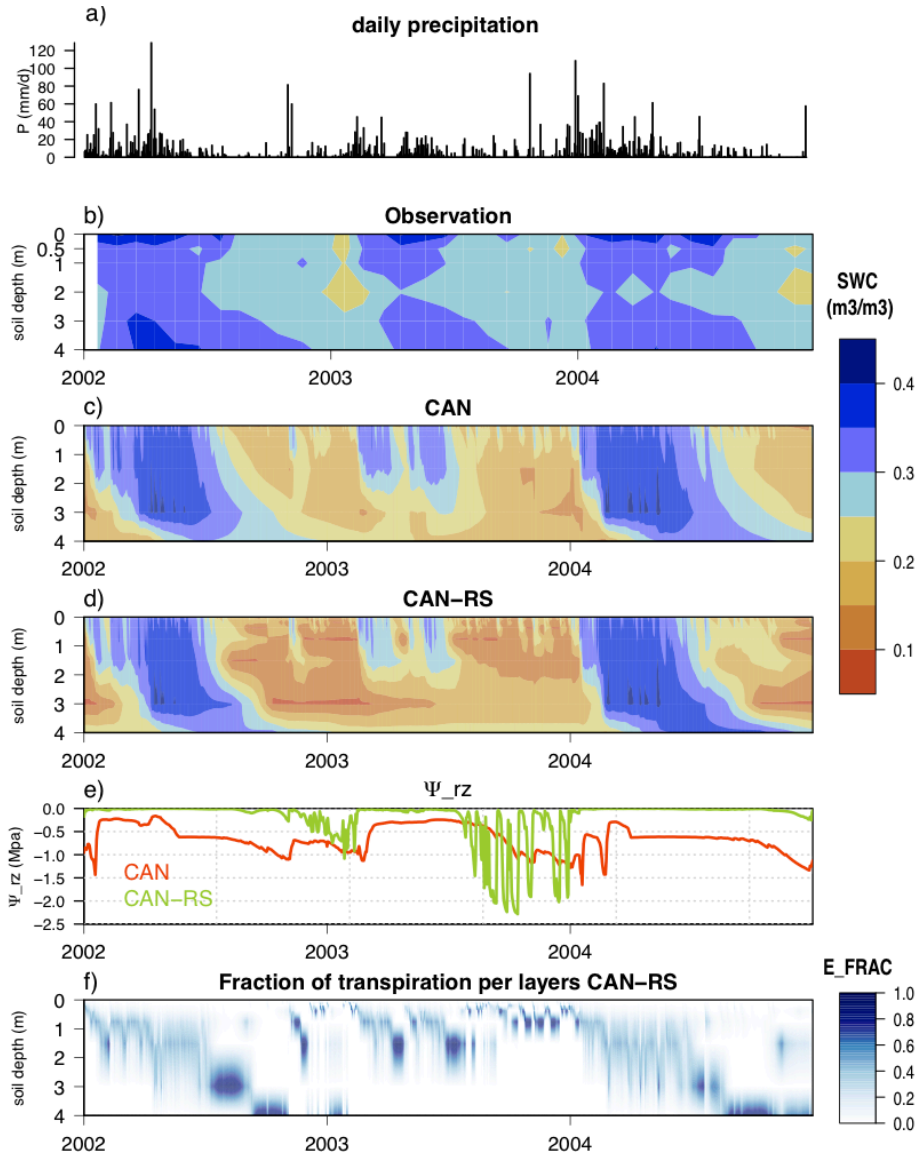

5 **Figure 6.** Daily times series from 2002 to 2004 at K67 of (a) precipitation, (b) observed soil moisture profile, (c) soil moisture (SWC) profile simulated in CAN (d) and soil moisture (SWC) profile simulated in CAN-RS, (e) soil water potential in the rooting zone ( $\Psi_{rz}$ ), and (f) simulated soil profile of the contribution of each layer to total root water uptake  $E_{frac}(l)$  from CAN-RS, defined as  $E_{max}(l)$  divided by the sum of  $E_{max}$  across all layers.

10

### 3.1.3 Forest structure

We found that both CAN and CAN-RS both correctly reproduced forest establishment from bare soil based on empirical data on forest regeneration (Chave et al., in prep) in French Guiana near GFG (Fig. 7), starting with a fast increase in AGB and BA, which levelled off as self-thinning began.

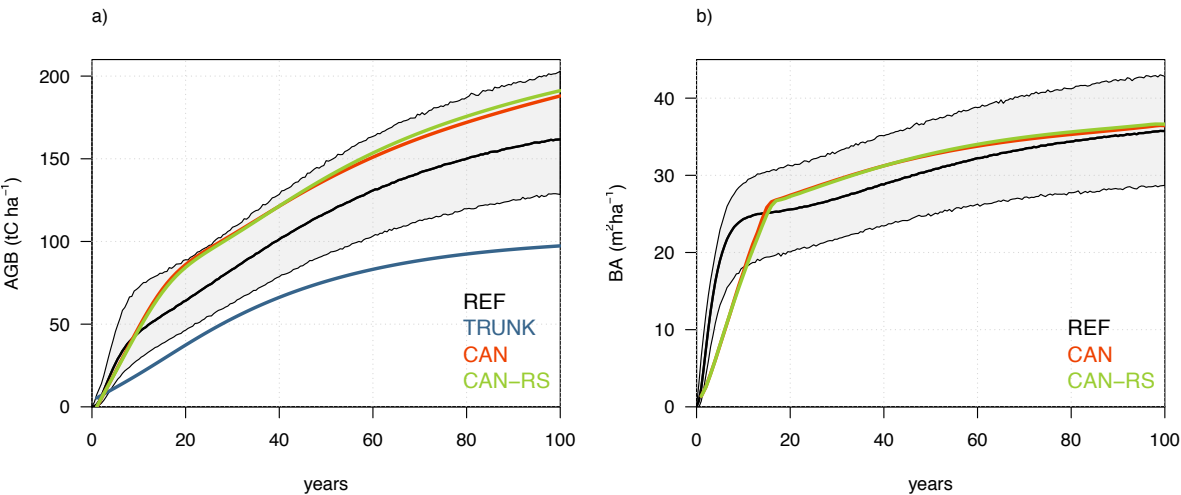

5 **Figure 7. Dynamics of (a) the aboveground biomass (AGB) and (b) basal area simulated by the different versions of ORCHIDEE soil during the first hundred years after clear-cut, compared to tree inventory data in the regeneration experiment ARBOCEL (REF) (Chave et al., in prep).**

10 The representation of the forest by CAN-RS (or CAN), while more realistic than a big-leaf model (such as TRUNK), remains an approximation because it considers only 20 classes of tree diameter and mono-specific (single PFT) parameters within the forest. When comparing the simulated and measured forest structure at GFG using a forest inventory and measured tree heights (Fig. 8), CAN-RS and CAN showed a realistic diameter-height allometric relationship (Fig. 8a) and a diameter-size distribution with many small trees, and few large trees (Fig. 8b). However, the number of individuals was overestimated in CAN-RS with 800 trees  $\text{ha}^{-1}$  compared to 600 trees  $\text{ha}^{-1}$  from the forest inventory.

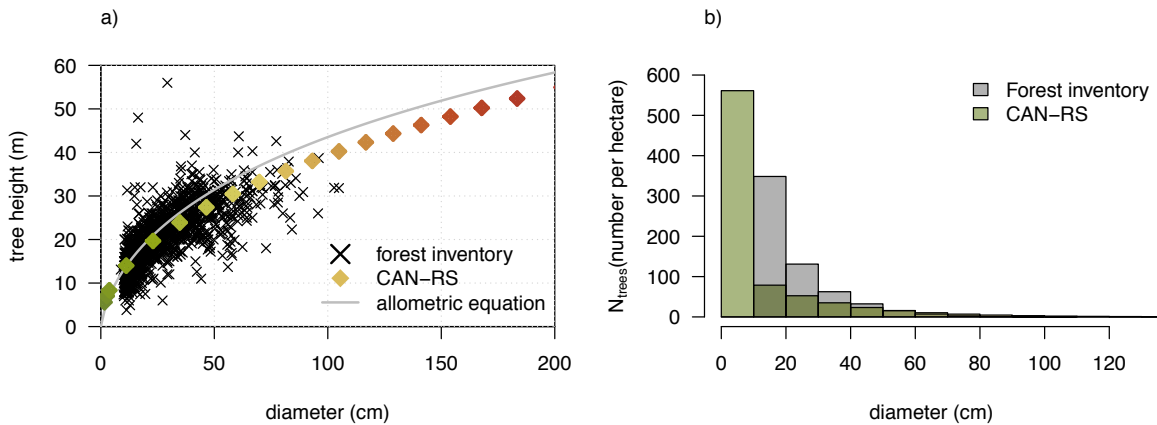

**Figure 8. Forest structure modelled in CAN-RS compared to forest inventory data over non-disturbed plots at Paracou (French Guiana), with (a) allometric relationship between tree diameter and tree height for the 20 simulated diameter classes in CAN-RS plotted in colours compared to 1592 measurements; plotted in grey, the diameter-height allometric equation for tropical forest proposed by *Chave et al.*, [2014]; Eq. (6a); (b) mean diameter distribution per hectare for CAN-RS compared to the 2014 forest inventory of a 6.25 ha plot in Paracou.**

In CAN simulations we found more trees ( $930 \text{ trees ha}^{-1}$ ), but with a smaller mean diameter (Fig. 9a). The higher GPP in CAN-RS than in CAN (especially during the dry season; Fig. 4) allows CAN-RS to grow more large trees, (Fig. 9a), leading to a higher self-thinning effect, and slightly fewer saplings and poles than in CAN (Fig. 9b). This difference in forest structure translates into a higher AGB than in CAN ( $228$  versus  $206 \text{ tC ha}^{-1}$ , Table 2).

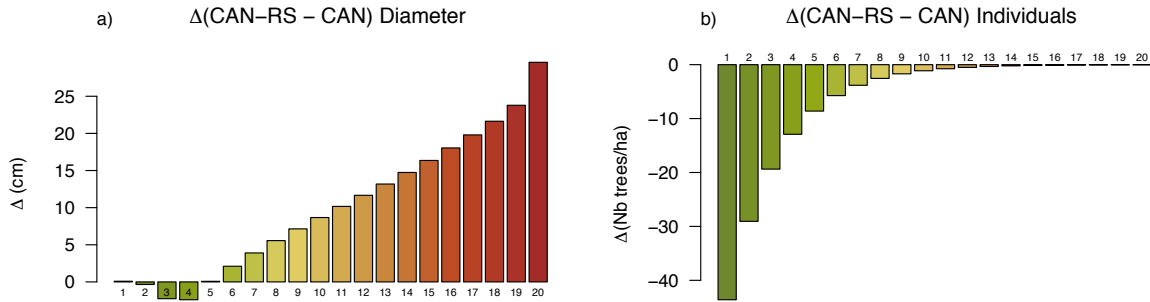

**Figure 9. Comparison of the difference ( $\Delta$ ) between CAN-RS and CAN for: (a) mean trunk diameter per cohort, and (b) number (Nb) of trees per cohort. Cohorts are illustrated as coloured bars numbered from 1 to 20, at Paracou, French Guiana (GFG).**

### 3.2 Regional evaluation

#### 3.2.1 Carbon and water fluxes

Compared to the in situ fluxes at the three sites, both TRUNK and CAN-RS simulated ET and GPP reasonably well, except at M34 (Fig. 4 and Table 2). At regional scale, however, both models slightly overestimated annual LE (Fig. S1) and GPP (Fig. S2) when compared to the regional GLEAM LE and FLUXCOM GPP products. Differences can be partly explained by the fact that at local scale, models were forced with hourly local meteorological data, while for regional simulations we used the 6-hourly CRU-NCEP fields. Another explanation is the large uncertainties associated with the regional products over the tropics. For example, both models correctly simulated total ET as compared with the ET product from *Jung et al.*, [2011] covering the 1982-2008 period (Fig. S1).

ET and GPP simulated by CAN-RS reproduced the spatial pattern from GLEAM ET and FLUXCOM GPP, with higher annual fluxes in the northeast and southwest of Amazonia, and lower GPP along the southeast border (Figs. S1a;c, S3 a;c). In CAN-RS these patterns were mainly driven by a relatively high downwelling shortwave radiation, and higher precipitation in these areas (Fig. S6). TRUNK simulated a more homogeneous pattern and was less sensitive to climate gradients than CAN-RS.

CAN-RS simulated higher annual mean ET and GPP than CAN over the Guianan and Brazilian Shields (Fig. 2, Fig. 10a, Fig. 11a). Comparison of monthly time series averages across the shields (Figs. 10a and 11a) shows that CAN-RS gives a better fit than CAN for both ET (0.81 versus 0.21 in the Guianan Shield, and 0.52 versus 0.40 in the Brazilian Shield) and GPP (0.42 versus 0.32 in the Guianan Shield, and 0.73 versus 0.67 in the Brazilian Shield). CAN simulated a drastic reduction in LE and GPP during the dry seasons (Fig. S7) and even in the months following, while CAN-RS simulated a higher dry-season ET and GPP that better matched the dry-season observations (Figs. 10b and c, Figs. 11b and c) and simulated a more realistic SWC-GPP relationship (Fig. S4).

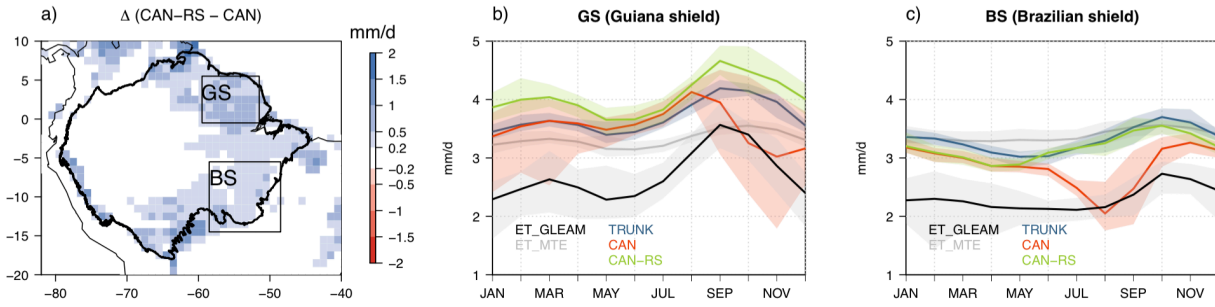

**Figure 10. (a) Difference in predicted annual mean evapotranspiration (ET) between the simulations of CAN-RS and CAN from 1982 to 2016. Comparison of the reference (GLEAM) and simulated ET (TRUNK, CAN and CAN-RS) mean seasonal cycle over (b) the Guianan Shield, and (c) the Brazilian Shield, including all pixels with at least 50% cover by evergreen tropical forest. The envelopes represent the monthly minimum and maximum over the entire period for each variable.**

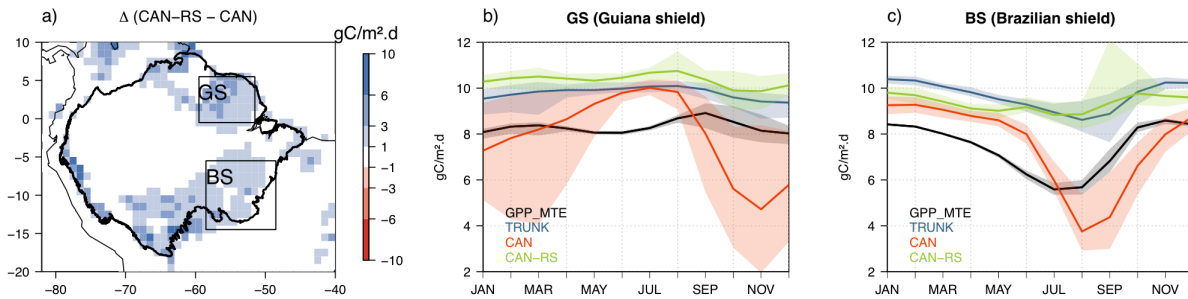

**Figure 11. (a) Difference in predicted annual mean GPP between the simulations of CAN-RS and CAN from 1981 to 2013. Comparison of the observed GPP and simulated GPP (TRUNK, CAN and CAN-RS) mean seasonal cycle over (b) the Guianan Shield, and (c) the Brazilian Shield. envelopes describe the minimum and maximum values over the considered period, including all**

### 3.2.2 Carbon stocks



The AGB stocks simulated by TRUNK were half of those simulated by CAN-RS (Fig. S5a and b), and CAN-RS also predicted a higher AGB than CAN over the Guianian and Brazilian Shields, due to higher GPP during the dry seasons (Fig. 11). This is explained by differences in parameterization and in the tree mortality processes, keeping in mind that only crowding mortality is modelled and not climate-induced (drought) mortality. In Amazonia, the simulated carbon-use efficiency (CUE, the ratio of NPP to GPP) was higher in CAN-RS (0.42) than in TRUNK (0.30), because of lower maintenance respiration ( $R_{A,m}$ ) in CAN-RS (3.1 versus 5.3  $\text{gC m}^{-2} \text{d}^{-1}$ ) as the growth respiration was slightly higher (1.4 versus 1.1  $\text{gC m}^{-2} \text{d}^{-1}$ ). CAN-RS overestimated AGB, especially in the southwest part of the basin, but we emphasize that the model was calibrated using sites with relatively high AGB mainly located in the northeast of Amazonia (Table 1, Fig. 2 and Fig. 12). Results from both models fit in the range of CUE field observations ranking from 0.27 to 0.52 [Malhi *et al.*, 2009a, 2015], but in CAN-RS (and CAN),  $R_{A,m}$  is calculated for each living compartment as a function of temperature, biomass, prescribed carbon/nitrogen ratio and  $k_{\text{maint}}$ , the fraction of allocatable photosynthates consumed for maintenance and growth respiration (which is a tunable parameter, see Table S2). Parameter  $k_{\text{maint}}$  is poorly constrained by observations [Sitch *et al.*, 2003], and it can be optimized (e.g., as by Naudts *et al.* (2015)) for each site) or manually tuned, as in this study. TRUNK simulated a lower CUE, but underestimated AGB (Table 1, Fig. S5). Contrary to CAN in which mortality is an emerging result of modelled competition processes via self-thinning (Fig. 1), in TRUNK the background tree mortality is very simply set as a constant fraction of the woody carbon pool, defined by a “residence time” parameter which is poorly constrained by observations [Sitch *et al.*, 2003]. Thus, it is possible to capture a realistic AGB with TRUNK by adjusting this residence time value, while in CAN-RS and CAN tuning the model to reproduce AGB is not trivial. Nevertheless, the three model versions appear to lack the mechanisms underlying the observed SW-NE gradient in AGB, that have been hypothesized to relate to soil fertility (phosphorus), tree species or soil mechanical resistance.

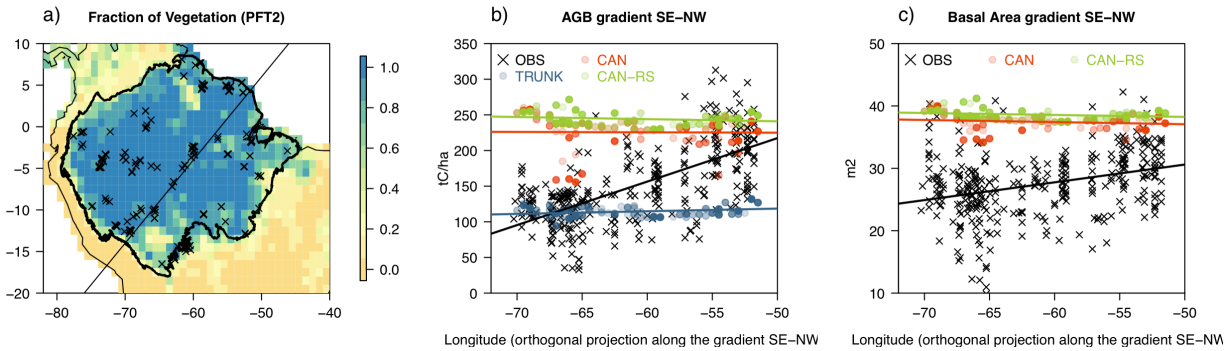

**Figure 12.** (a) Fraction of evergreen tropical forests input in ORCHIDEE and location of the in situ inventories collected by *Mitchard et al.*, [2014]; (b) comparison of simulated aboveground biomass and (c) basal area from the field inventory measurements along the SE-NW gradient indicated in (a).

## 4. Discussion

### 4.1 Root water uptake module and soil hydraulic parameters

With the mechanistic root water uptake module implemented in CAN-RS version of ORCHIDEE, trees preferentially used water in the deepest soil layer during the dry season. Through this process, the model better captured the seasonality of GPP and LE than CAN. The effect was strongest for soil types with a constraining soil water retention curve (e.g., clay USDA soil type 12). The root water uptake model was successfully validated under severe drought conditions [Fisher *et al.*, 2006]



and for other ecosystems (e.g. by *Williams et al.* (2001)), and can therefore be extrapolated to other PFTs for global simulations using CAN-RS. CAN, like other DGVMs [*Getirana et al.*, 2014; *Guimberteau et al.*, 2014; *Restrepo-Coupe et al.*, 2016], was unable to maintain LE and GPP fluxes during the dry season.

- 5 A previous modelling study using TRUNK showed the importance of deep roots by optimizing soil depth parameters at 10 m for seasonal variation of fluxes in Amazonia [*Poulter et al.*, 2009; *Verbeeck et al.*, 2011]. However, this is a model artefact as TRUNK's water stress function directly links available soil moisture content to leaf gas exchange. Increasing soil depth in TRUNK will always increase the water storage capacity, but will not shift tree water uptake to the deepest layers during dry seasons since the root profile is fixed and exponentially decreases from top to bottom in the soil column. By using the soil-to-root resistance weighting scheme and a relatively deep soil (4 m) that contains most of the fine roots (as observed by Markewitz et al. (2010); Nepstad et al. (1994); Schenk and Jackson (2005)), CAN-RS sustains productivity by explicitly simulating the observed shift of water uptake to deeper and wetter soil layers during the dry season [*Moreira et al.*, 2000].

- Because of its explicit hydraulic architecture, CAN and CAN-RS are more sensitive than TRUNK (water stress function) to the parameters of the Mualem-van Genuchten Model [*Mualem*, 1976; *van Genuchten*, 1980]. For example, they simulate a non-observed midday depression (Fig. 5), indicating that the above-ground hydraulic path needs to be revisited. It is well known that changes in the spatial resolution of the soil input data by aggregating small-scale information causes serious problems in models [*Van Looy et al.*, 2017], as well as the use of coarse soil texture classes [*Kishné et al.*, 2017]. Thus, along with improving model representation of the hydraulic gradient from the soil to the plant in DGVMs [this study, *Sperry et al.*, 2002; *Fisher et al.*, 2006], it is important to improve the parameterization of the physical soil environment [*Marthews et al.*, 2014].

## 4.2 Modeling forest structure and demography

- 25 As with most DGVMs [*Castanho et al.*, 2015; *Johnson et al.*, 2016], TRUNK, CAN and CAN-RS fail to capture the SW-NE gradient of AGB (and BA) across Amazonia (Fig. 12) — they simulate a quasi-constant AGB across the basin (Fig. S5). This AGB gradient could be caused either by productivity or tree mortality. Spatial variation in wood productivity can be linked to spatial variability in soil properties [*Quesada et al.*, 2012], like soil fertility [*ter Steege et al.*, 2006 ; *Malhi et al.*, 2004, Turner et al., 2018] and soil hydraulic parameters. Therefore, the incorporation of detailed soil hydraulic parameters maps (e.g., [*Marthews et al.*, 2014]) and inclusion of nutrient cycles into ORCHIDEE would yield advances. Besides, and because of the negative relationship between soil fertility and wood density [*Baker et al.*, 2004; *ter Steege et al.*, 2006; *Patiño et al.*, 2009], and wood density and tree mortality [*King et al.*, 2006]; wood density should vary across the basin (rather than using a single parameter for the evergreen tropical forest PFT); this requires the use of wood density maps [*ter Steege et al.*, 2006]. Finally, mortality processes need to be linked to edaphic properties.

- 35 Besides variation in productivity, it has been shown that variation in tree mortality is a key driver of AGB across Amazonia [*Johnson et al.*, 2016 and references within]. TRUNK, CAN and CAN-RS show a quasi-linear positive relationship between NPP and AGB, despite their differences in forest representation and tree mortality scheme over Amazonia (Fig. 13a) and when focusing on different regions of the basin (Figs. S8 and S9). For high NPP, CAN-RS and CAN showed a saturation of GPP (not shown) and AGB around 250 tC ha<sup>-1</sup> (Fig. 13a) due to a breakpoint in precipitation at 2000 mm yr<sup>-1</sup> (Fig. 13b), this phenomenon was also identified by Alstrom et al., 2016. CAN-RS has similar performance than the big-leaf / single biomass pool TRUNK version to represent forest fluxes, stocks and dynamics (Figs. S1,S3,S5,12,13), despite its higher complexity and more realistic description of soil water uptake and demography. This is a positive result since a model like TRUNK is easier to adjust and intrinsically more stable, but less informative. For instance, adjusting the constant mortality parameter in

TRUNK allows to match the observed biomass well, but lacks a mechanistic basis. CAN-RS offers the advantage to be assessable against other key measurable forest stand variables than total biomass, such as height and diameter classes for different forest ages (e.g. *Joetzjer et al.*, [2017]). Nevertheless, since demography parameters in CAN-RS are set constant for a single PFT describing all evergreen tropical forests, spatial variability of growth rates and mortality across the Amazon remains rather uniform compared to observations. Additional processes such as climate driven mortality and nutrient (phosphorus) limitation on growth leading to the prevalence of species with different functional traits across the Amazon would need to be included in the future development of this model.

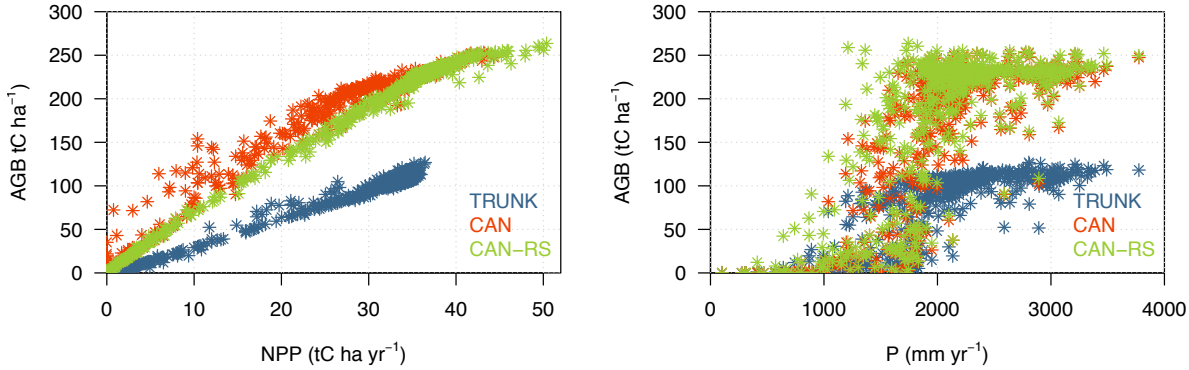

**Figure 13. (a) scatter plots of mean AGB from 1981 to 2016 plotted against mean annual NPP and (b) annual precipitation averaged over the same time period for Amazonia.**

#### 4.3. Concluding remarks

The simple description of forest demography in CAN does not improve stock and fluxes representation compared to the TRUNK, but it allows to model stand variables (diameter, height distributions) that are just ignored in TRUNK. We do not expect an automatic improvement of the performance of CAN-RS against TRUNK and we view as positive result that the more realistic CAN version has in fact similar performance than the easy-to-tune TRUNK version, while allowing to evaluate the CAN output against a new set of measurable variables that are known to be important to understand forest carbon dynamics. This approach is similar to C. Prentice (2015)'s remark: *"Although it seems reasonable to expect that a model including a larger subset of processes that are known to be important should be more realistic than a simpler model, increases in reliability and robustness are by no means automatic"*, which justifies the inclusion of known important processes and calls for observations to evaluate those new processes. Concerning the root water uptake scheme, CAN-RS and TRUNK show similar performances. However, TRUNK uses a simplistic formulation of soil water stress on stomatal conductance through  $V_{cmax}$  (see section D in SI), while in CAN water supply is calculated via a more realistic hydraulic architecture inspired from Hickler et al. (2006). Having a mechanistic representation of soil water stress is crucial for DGVMs to understand the vegetation response to drought. Our point here is to show that in normal conditions, CAN-RS performs as well as the TRUNK, but because of its mechanistic approach CAN-RS has more potential, for instance to simulate hydraulic failure (and possibility mortality occurring from it). Comparing CAN to CAN-RS, showed that trees preferentially use water in the deepest soil layer during the dry season which led to improve LE and GPP seasonality for the soil types with a constraining soil water retention curve. Thus, because of a more realistic representation of forest structure and root water uptake than TRUNK, CAN-RS should be used in future studies.

## Acknowledgments

Data acquisition in French Guiana was supported by an “investissement d’avenir” grant from the Agence Nationale de la Recherche (CEBA, ref ANR-10-LABX-25-01). J.B. acknowledges support from (CR)<sup>2</sup> Chile (CONICYT/FONDAP/15110009). Matthieu Guimberteau, D. Goll and P. Ciais are funded by the European Research Council Synergy grant ERC-2013-SyG-610028 IMBALANCE-P. We also acknowledge the European Union Climate KIC grant FOREST Specific Grant Agreement EIT/CLIMATE KIC/SGA2016/1CNES (TOSCA program) for funding.

## References

- Ahlström, A., G. Schurgers, A. Arneth, and B. Smith (2012), Robustness and uncertainty in terrestrial ecosystem carbon response to CMIP5 climate change projections, *Environ. Res. Lett.*, 7(4), 044008, doi:10.1088/1748-9326/7/4/044008.
- 15 Arora, V. K. et al. (2013), Carbon–Concentration and Carbon–Climate Feedbacks in CMIP5 Earth System Models, *J. Clim.*, 26(15), 5289–5314, doi:10.1175/JCLI-D-12-00494.1.
- Baker, T. et al. (2004), Increasing biomass in Amazonian forest plots, *Philos. Trans. R. Soc. Lond. B. Biol. Sci.*, doi:10.1098/rstb.2003.1422.
- 20 Baldocchi, D., E. Falge, and L. Gu (2001), FLUXNET: A new tool to study the temporal and spatial variability of ecosystem-scale carbon dioxide, water vapor, and energy flux densities, *Bull. Am. Meteorol. Soc.*, 82(11), 2415–2434.
- Ball, J. T., I. E. Woodrow, and J. A. Berry (1987), A Model Predicting Stomatal Conductance and its Contribution to the Control of Photosynthesis under Different Environmental Conditions, in *Progress in Photosynthesis Research*, pp. 221–224.
- 25 Bellassen, V., G. Le Maire, DhôteJ.F., P. Ciais, and N. Viovy (2010), Modelling forest management within a global vegetation model-Part 1: Model structure and general behaviour, *Ecol. Modell.*, 221(20), 2458–2474, doi:10.1016/j.ecolmodel.2010.07.008.
- Bonal, D. et al. (2008), Impact of severe dry season on net ecosystem exchange in the Neotropical rainforest of French Guiana, *Glob. Chang. Biol.*, 14(8), 1917–1933, doi:10.1111/j.1365-2486.2008.01610.x.
- Bonan, G. B., M. Williams, R. a. Fisher, and K. W. Oleson (2014), Modeling stomatal conductance in the earth system: linking leaf water-use efficiency and water transport along the soil–plant–atmosphere continuum, *Geosci. Model Dev.*, 7(5), 2193–2222, doi:10.5194/gmd-7-2193-2014.
- 30 Booth, B. B. B., C. D. Jones, M. Collins, I. J. Totterdell, P. M. Cox, S. Sitch, C. Huntingford, R. a Betts, G. R. Harris, and J. Lloyd (2012), High sensitivity of future global warming to land carbon cycle processes, *Environ. Res. Lett.*, 7(2), 024002, doi:10.1088/1748-9326/7/2/024002.
- 35 Brienen, R. J. W. et al. (2015), Long-term decline of the Amazon carbon sink, *Nature*, 519(7543), 344–348, doi:10.1038/nature14283.
- Campoy, A., A. Ducharne, F. Cheruy, F. Hourdin, J. Polcher, and J. C. Dupont (2013), Response of land surface fluxes and precipitation to different soil bottom hydrological conditions in a general circulation model, *J. Geophys. Res. Atmos.*, 118(19), 10725–10739, doi:10.1002/jgrd.50627.
- 40 Carsel, R. F., and R. S. Parrish (1988), Developing joint probability distributions of soil water retention characteristics, *Water Resour. Res.*, 24(5), 755–769, doi:10.1029/WR024i005p00755.
- Castanho, A. D. A., D. Galbraith, K. Zhang, M. T. Coe, M. H. Costa, and P. Moorcroft (2015), Changing Amazon biomass and the role of atmospheric CO<sub>2</sub> concentration, climate, and land use, *Global Biogeochem. Cycles*, 30, 18–39, doi:10.1002/2015GB005135.Received.
- 45 Chave, J. et al. (2005), Tree allometry and improved estimation of carbon stocks and balance in tropical forests., *Oecologia*, 145(1), 87–99, doi:10.1007/s00442-005-0100-x.
- Chave, J. et al. (2014), Improved allometric models to estimate the aboveground biomass of tropical trees, *Glob. Chang. Biol.*, 20(10), 3177–3190, doi:10.1111/gcb.12629.

- Christoffersen, B. O. et al. (2014), Mechanisms of water supply and vegetation demand govern the seasonality and magnitude of evapotranspiration in Amazonia and Cerrado, *Agric. For. Meteorol.*, 191(February), 33–50, doi:10.1016/j.agrformet.2014.02.008.
- Deleuze, C., O. Pain, J. Dhote, and J.-C. Hervé (2004), A flexible radial increment model for individual trees in pure age stands, *Ann. For. Sci.*, 61(4), 327–335, doi:10.1051/forest.
- Dubois-Fernandez, P. C., T. Le Toan, S. Daniel, H. Oriot, J. Chave, L. Blanc, L. Villard, M. W. J. Davidson, and M. Petit (2012), The tropiSAR airborne campaign in French Guiana: Objectives, description, and observed temporal behavior of the backscatter signal, *IEEE Trans. Geosci. Remote Sens.*, 50(8), 3228–3241, doi:10.1109/TGRS.2011.2180728.
- Duursma, R. A., and B. E. Medlyn (2012), MAESPA: A model to study interactions between water limitation, environmental drivers and vegetation function at tree and stand levels, with an example application to [CO<sub>2</sub>] ?? drought interactions, *Geosci. Model Dev.*, 5(4), 919–940, doi:10.5194/gmd-5-919-2012.
- Eltahir, E. a. B., and R. L. Bras (1994), Precipitation recycling in the Amazon basin, *Q. J. R. Meteorol. Soc.*, 120(518), 861–880, doi:10.1002/qj.49712051806.
- Farquhar, G., S. von Caemmerer, and J. Berry (1980), A biochemical model of photosynthetic CO<sub>2</sub> assimilation in leaves of C<sub>3</sub> species, *Planta*, 90, 78–90.
- Fischer, R. et al. (2016), Lessons learned from applying a forest gap model to understand ecosystem and carbon dynamics of complex tropical forests, *Ecol. Modell.*, 326(January), 124–133, doi:10.1016/j.ecolmodel.2015.11.018.
- Fisher, R., N. McDowell, D. Purves, P. Moorcroft, S. Sitch, P. Cox, C. Huntingford, P. Meir, and F. I. Woodward (2010), Assessing uncertainties in a second-generation dynamic vegetation model caused by ecological scale limitations., *New Phytol.*, 187(3), 666–81, doi:10.1111/j.1469-8137.2010.03340.x.
- Fisher, R. A. et al. (2018), Vegetation demographics in Earth System Models: A review of progress and priorities, *Glob. Chang. Biol.*, 24(1), 35–54, doi:10.1111/gcb.13910.
- Fisher, R. a, M. Williams, R. L. Do Vale, A. L. Da Costa, and P. Meir (2006), Evidence from Amazonian forests is consistent with isohydric control of leaf water potential., *Plant. Cell Environ.*, 29(2), 151–65.
- Fyllas, N. M. et al. (2014), Analysing Amazonian forest productivity using a new individual and trait-based model (TFS v.1), *Geosci. Model Dev.*, 7(1), 1413–1452, doi:10.5194/gmdd-7-1413-2014.
- Gardner, W. R. (1960), Dynamic aspects of water availability to plants, *Soil Sci.*, 89(2), 63–73, doi:10.1097/00010694-196002000-00001.
- van Genuchten, M. T. (1980), A Closed-form Equation for Predicting the Hydraulic Conductivity of Unsaturated Soils1, *Soil Sci. Soc. Am. J.*, 44(5), 892, doi:10.2136/sssaj1980.036159950044000500002x.
- Getirana, A. C. V. et al. (2014), Water Balance in the Amazon Basin from a Land Surface Model Ensemble, *J. Hydrometeorol.*, 15(6), 2586–2614, doi:10.1175/JHM-D-14-0068.1.
- Gourlet-Fleury, S., B. Ferry, J.-F. Molino, P. Petronelli, and L. Schmitt (2004), Paracou expérimental plots : keys features, in *Ecology and management of a neotropical rainforest : lessons drawn from Paracou, a long-term experimental research site in French Guiana*, pp. 3–60.
- Guimberteau, M. et al. (2012), Discharge simulation in the sub-basins of the Amazon using ORCHIDEE forced by new datasets, *Hydrol. Earth Syst. Sci.*, 16(3), 911–935, doi:10.5194/hess-16-911-2012.
- Guimberteau, M., a. Ducharne, P. Ciais, J. P. Boisier, S. Peng, M. De Weirtdt, and H. Verbeeck (2014), Testing conceptual and physically based soil hydrology schemes against observations for the Amazon Basin, *Geosci. Model Dev.*, 7(3), 1115–1136, doi:10.5194/gmd-7-1115-2014.
- Hickler, T., I. C. Prentice, B. Smith, M. T. Sykes, and S. Zaehle (2006), Implementing plant hydraulic architecture within the LPJ Dynamic Global Vegetation Model, *Glob. Ecol. Biogeogr.*, 15(6), 567–577, doi:10.1111/j.1466-8238.2006.00254.x.
- Ho Tong Minh, D. et al. (2016), SAR tomography for the retrieval of forest biomass and height: Cross-validation at two tropical forest sites in French Guiana, *Remote Sens. Environ.*, 175, 138–147, doi:10.1016/j.rse.2015.12.037.
- Hollinger, D. Y., and A. D. Richardson (2005), Uncertainty in eddy covariance measurements and its application to physiological models., *Tree Physiol.*, 25(7), 873–85.
- Joetzjer, E. et al. (2014), Predicting the response of the Amazon rainforest to persistent drought conditions under current and

- future climates: a major challenge for global land surface models, *Geosci. Model Dev.*, 7(6), 2933–2950, doi:10.5194/gmd-7-2933-2014.
- Joetzjer, E. et al. (2017), Assimilating satellite-based canopy height within an ecosystem model to estimate above ground forest biomass, *Geophys. Res. Lett.*, 1–10, doi:10.1002/2017GL074150.
- 5 Johnson, M. O. et al. (2016), Variation in stem mortality rates determines patterns of aboveground biomass in Amazonian forests: implications for dynamic global vegetation models., *Glob. Chang. Biol.*, 44(April), 1–18, doi:10.1111/gcb.13315.
- Jones, C. et al. (2013), Twenty-First-Century Compatible CO<sub>2</sub> Emissions and Airborne Fraction Simulated by CMIP5 Earth System Models under Four Representative Concentration Pathways, *J. Clim.*, 26(13), 4398–4413, doi:10.1175/JCLI-D-12-00554.1.
- 10 Jung, M. et al. (2011), Global patterns of land-atmosphere fluxes of carbon dioxide, latent heat, and sensible heat derived from eddy covariance, satellite, and meteorological observations, *J. Geophys. Res.*, 116, 1–16, doi:10.1029/2010JG001566.
- Jung, M. et al. (2017), Compensatory water effects link yearly global land CO<sub>2</sub> sink changes to temperature, *Nature*, 541(7638), 516–520, doi:10.1038/nature20780.
- 15 King, D. A., S. J. Davies, S. Tan, and N. S. M. Noor (2006), The role of wood density and stem support costs in the growth and mortality of tropical trees, *J. Ecol.*, 94(3), 670–680, doi:10.1111/j.1365-2745.2006.01112.x.
- Kishné, A. S., Y. T. Yimam, C. L. S. Morgan, and B. C. Dornblaser (2017), Evaluation and improvement of the default soil hydraulic parameters for the Noah Land Surface Model, *Geoderma*, 285, 247–259, doi:10.1016/j.geoderma.2016.09.022.
- 20 Kohyama, T. (1992), Density-size dynamics of trees simulated by a one-sided competition multi-species model of rain forest stands, *Ann. Bot.*, 70(5), 451–460, doi:10.1093/oxfordjournals.aob.a088502.
- Krinner, G., N. Viovy, N. de Noblet-Ducoudré, J. Ogée, J. Polcher, P. Friedlingstein, P. Ciais, S. Sitch, and I. C. Prentice (2005), A dynamic global vegetation model for studies of the coupled atmosphere-biosphere system, *Global Biogeochem. Cycles*, 19(1), doi:10.1029/2003GB002199.
- 25 Larcher, W. (2003), The environment of plantst, in *Physiological Plant Ecology*, pp. 1–67.
- Lardy, R., G. Bellocchi, and J. F. Soussana (2011), A new method to determine soil organic carbon equilibrium, *Environ. Model. Softw.*, 26(12), 1759–1763, doi:10.1016/j.envsoft.2011.05.016.
- Lasslop, G., M. Reichstein, D. Papale, A. D. Richardson, A. Arneth, A. Barr, P. Stoy, and G. Wohlfahrt (2010), Separation of net ecosystem exchange into assimilation and respiration using a light response curve approach: critical issues and global evaluation, *Glob. Chang. Biol.*, 16(1), 187–208, doi:10.1111/j.1365-2486.2009.02041.x.
- 30 Levine, N. M. et al. (2016), Ecosystem heterogeneity determines the ecological resilience of the Amazon to climate change., *Proc. Natl. Acad. Sci. U. S. A.*, 113(3), 1511344112–, doi:10.1073/pnas.1511344112.
- Van Looy, K. et al. (2017), Pedotransfer Functions in Earth System Science: Challenges and Perspectives, *Rev. Geophys.*, 55(4), 1199–1256, doi:10.1002/2017RG000581.
- 35 Lovenduski, N. S., and G. B. Bonan (2017), Reducing uncertainty in projections of terrestrial carbon uptake, , 12, doi:10.1088/1748-9326/aa66b8.
- Malhi, Y. et al. (2009a), Comprehensive assessment of carbon productivity, allocation and storage in three Amazonian forests, *Glob. Chang. Biol.*, 15(5), 1255–1274, doi:10.1111/j.1365-2486.2008.01780.x.
- 40 Malhi, Y., S. Saatchi, C. Girardin, and L. Aragão (2009b), The production, storage, and flow of carbon in Amazonian forests, *Geophys. Monogr. Ser.*, 355–372.
- Malhi, Y. et al. (2015), The linkages between photosynthesis, productivity, growth and biomass in lowland Amazonian forests, *Glob. Chang. Biol.*, 21(6), 2283–2295, doi:10.1111/gcb.12859.
- Maréchaux, I., and J. Chave (2017), An individual-based forest model to jointly simulate carbon and tree diversity in Amazonia: description and applications, *Ecol. Monogr.*, 0(0), 1–33, doi:10.1002/ecm.1271.
- 45 Markewitz, D., S. Devine, E. a Davidson, P. Brando, and D. C. Nepstad (2010), Soil moisture depletion under simulated drought in the Amazon: impacts on deep root uptake., *New Phytol.*, 187(3), 592–607, doi:10.1111/j.1469-8137.2010.03391.x.

- Martens, B., D. G. Miralles, H. Lievens, R. Van Der Schalie, R. A. M. De Jeu, D. Fernández-Prieto, H. E. Beck, W. A. Dorigo, and N. E. C. Verhoest (2017), GLEAM v3: Satellite-based land evaporation and root-zone soil moisture, *Geosci. Model Dev.*, 10(5), 1903–1925, doi:10.5194/gmd-10-1903-2017.
- Marthews, T. R., C. A. Quesada, D. R. Galbraith, Y. Malhi, C. E. Mullins, M. G. Hodnett, and I. Dharssi (2014), High-resolution hydraulic parameter maps for surface soils in tropical South America, *Geosci. Model Dev.*, 7(3), 711–723, doi:10.5194/gmd-7-711-2014.
- McGrath, M. J., J. Ryder, B. Pinty, J. Otto, K. Naudts, A. Valade, Y. Chen, J. Weedon, and S. Luyssaert (2016), A multi-level canopy radiative transfer scheme for ORCHIDEE (SVN~r2566), based on a domain-averaged structure factor, *Geosci. Model Dev. Discuss.*, 2016(November), 1–22, doi:10.5194/gmd-2016-280.
- 10 Metcalfe, D. B. et al. (2008), The effects of water availability on root growth and morphology in an Amazon rainforest, *Plant Soil*, 311(1–2), 189–199, doi:10.1007/s11104-008-9670-9.
- Meyer, V., S. Saatchi, D. B. Clark, M. Keller, G. Vincent, A. Ferraz, F. Espírito-Santo, M. V. N. d'Oliveira, D. Kaki, and J. Chave (2018), Canopy Area of Large Trees Explains Aboveground Biomass Variations across Nine Neotropical Forest Landscapes, *Biogeosciences Discuss.*, (January), 1–38, doi:10.5194/bg-2017-547.
- 15 Mitchard, E. T. a. et al. (2014), Markedly divergent estimates of Amazon forest carbon density from ground plots and satellites, *Glob. Ecol. Biogeogr.*, n/a-n/a, doi:10.1111/geb.12168.
- Moreira, A. A., D. Santini, and A. L. Ruhoff (2018), Avaliação dos produtos de evapotranspiração baseados em sensoriamento remoto MOD16 e GLEAM em sítios de fluxos turbulentos do Programa LBA Evaluation of remotely sensed evapotranspiration products MOD16 and GLEAM in eddy covariance flux sites from LBA Pro, *Ciencia e Nat.*, 112–118, doi:10.5902/2179460X30714.
- 20 Moreira, M. Z., L. D. L. Sternberg, and D. C. Nepstad (2000), Vertical patterns of soil water uptake by plants in a primary forest and an abandoned pasture in the eastern Amazon: an isotopic approach, *Plant Soil*, 222(1–2), 95–107, doi:10.1023/A:1004773217189.
- Mualem, Y. (1976), A new model for predicting the hydraulic conductivity of unsaturated porous media, *Water Resour. Res.*, 12(3), 513–521.
- 25 Naudts, K. et al. (2015), A vertically discretised canopy description for ORCHIDEE (SVN r2290) and the modifications to the energy, water and carbon fluxes, *Geosci. Model Dev.*, 8(6), 2035–2065, doi:10.5194/gmdd-7-8565-2014.
- Nepstad, D. C., C. R. de Carvalho, E. A. Davidson, P. H. Jipp, P. A. Lefebvre, G. H. Negreiros, E. D. da Silva, T. A. Stone, S. E. Trumbore, and S. Vieira (1994), The role of deep roots in the hydrological and carbon cycles of Amazonian forests and pastures, *Nature*, 372, 666–669, doi:10.1038/372666a0.
- 30 Nepstad, D. C., I. M. Tohver, D. Ray, P. Moutinho, and G. Cardinot (2007), Mortality of large trees and lianas following experimental drought in an Amazon forest., *Ecology*, 88(9), 2259–69.
- Newman, E. I. (1969), Resistance to Water Flow in Soil and Plant . I . Soil Resistance in Relation to Amounts of Root : Theoretical Estimates Author ( s ) : E . I . Newman Source : Journal of Applied Ecology , Vol . 6 , No . 1 ( Apr . , 1969 ), pp . 1-12 Published by : British E. *J. Appl. Ecol.*, 6(1), 1–12.
- 35 Patiño, S., J. Lloyd, and R. Paiva (2009), Branch xylem density variations across the Amazon Basin, *Biogeosciences*, (May 2008), 545–568.
- Phillips, O. L. et al. (2002), Changes in growth of tropical forests: Evaluating potential biases, *Ecol. Apr 2002; 12* 576-587, 12(2), 576–587.
- 40 Pillet, M., E. Joetzer, C. Belmin, J. Chave, P. Ciais, A. Dourdain, M. Evans, B. Hérault, S. Luyssaert, and B. Poulter (2017), Disentangling competitive versus climatic drivers of tropical forest mortality, *J. Ecol.*, (July), 1–15, doi:10.1111/1365-2745.12876.
- Poulter, B., U. Heyder, and W. Cramer (2009), Modeling the Sensitivity of the Seasonal Cycle of GPP to Dynamic LAI and Soil Depths in Tropical Rainforests, *Ecosystems*, 12(4), 517–533, doi:10.1007/s10021-009-9238-4.
- 45 Poulter, B., L. Aragão, U. Heyder, M. Gumpenberger, J. Heinke, F. Langerwisch, A. Rammig, K. Thonicke, and W. Cramer (2010), Net biome production of the Amazon Basin in the 21st century, *Glob. Chang. Biol.*, 16(7), 2062–2075, doi:10.1111/j.1365-2486.2009.02064.x.
- Powell, T. L. et al. (2013), Confronting model predictions of carbon fluxes with measurements of Amazon forests subjected

- to experimental drought., *New Phytol.*, doi:10.1111/nph.12390.
- Pyle, E. H. et al. (2008), Dynamics of carbon, biomass, and structure in two Amazonian forests, *J. Geophys. Res.*, *113*, doi:10.1029/2007JG000592.
- Quesada, C. A., J. Lloyd, L. O. Anderson, N. M. Fyllas, M. Schwarz, and C. I. Czimczik (2011), Soils of Amazonia with particular reference to the RAINFOR sites, *Biogeosciences*, *8*(6), 1415–1440, doi:10.5194/bg-8-1415-2011.
- Reichstein, M. et al. (2005), On the separation of net ecosystem exchange into assimilation and ecosystem respiration: review and improved algorithm, *Glob. Chang. Biol.*, *11*(9), 1424–1439, doi:10.1111/j.1365-2486.2005.001002.x.
- Reineke, L. H. (1933), Perfecting a stand-density index for even-aged forests, *J. Agric. Res.*, *46*(7), 627–638.
- Restrepo-Coupe, N. et al. (2016), Do dynamic global vegetation models capture the seasonality of carbon fluxes in the Amazon basin? A data-model intercomparison, *Glob. Chang. Biol.*, 191–208, doi:10.1111/gcb.13442.
- Rocha, H. Da (2004), Diel and seasonal patterns of tropical forest CO<sub>2</sub> exchange, *Ecol. Appl.*, *14*(4), 22–32.
- da Rocha, H. R. et al. (2009), Patterns of water and heat flux across a biome gradient from tropical forest to savanna in Brazil, *J. Geophys. Res.*, *114*, G00B12, doi:10.1029/2007JG000640.
- Rödig, E., M. Cuntz, A. Rammig, R. Fischer, F. Taubert, and A. Huth (2018), The importance of forest structure for carbon flux estimates in the Amazon rainforest, *Environ. Res. Lett.*, *in press*, doi:https://doi.org/10.1088/1748-9326/aabc61.
- de Rosnay, P., and J. Polcher (1998), Modelling root water uptake in a complex land surface scheme coupled to a GCM, *Hydrol. Earth Syst. Sci.*, *2*(2/3), 239–255, doi:10.5194/hess-2-239-1998.
- de Rosnay, P. De, J. Polcher, M. Bruen, and K. Laval (2002), Impact of a physically based soil water flow and soil-plant interaction representation for modeling large-scale land surface processes, *J. Geophys. Res.*, *107*(2).
- Schenk, H. J., and R. B. Jackson (2005), Mapping the global distribution of deep roots in relation to climate and soil characteristics, *Geoderma*, *126*(1–2 SPEC. ISS.), 129–140, doi:10.1016/j.geoderma.2004.11.018.
- Schmidhalter, U. (1997), The gradient between pre-dawn rhizoplane and bulk soil matric potentials, and its relation to the pre-dawn root and leaf water potentials of four species, *Plant, Cell Environ.*, *20*(7), 953–960, doi:10.1046/j.1365-3040.1997.d01-136.x.
- Shinozaki, K. Y. K. H. K. K. T. (1964), A quantitative analysis of plant form - the pipe model theory I. Basic analyses, *Japanese J. Ecol.*
- Shuttleworth, W. J. et al. (1984), Eddy-Correlation Measurements of Energy Partition for Amazonian Forest, *Q. J. R. Meteorol. Soc.*, *110*, 1162, doi:10.1002/qj.49711046622.
- Sitch, S., B. Smith, and I. Prentice (2003), Evaluation of ecosystem dynamics, plant geography and terrestrial carbon cycling in the LPJ dynamic global vegetation model, *Glob. Chang. Biol.*, 161–185.
- Sitch, S. et al. (2015), Recent trends and drivers of regional sources and sinks of carbon dioxide, *Biogeosciences*, *12*(3), 653–679, doi:10.5194/bg-12-653-2015.
- Sperry, J. S., U. G. Hacke, R. Oren, and J. P. Comstock (2002), Water deficits and hydraulic limits to leaf water supply, *Plant, Cell Environ.*, *25*(2), 251–263.
- ter Steege, H. et al. (2006), Continental-scale patterns of canopy tree composition and function across Amazonia., *Nature*, *443*(7110), 0–2, doi:10.1038/nature05134.
- Taylor, K. E. (2001), in a Single Diagram, *J. Geophys. Res.*, *106*(D7), 7183–7192.
- Tramontana, G. et al. (2016), Predicting carbon dioxide and energy fluxes across global FLUXNET sites with regression algorithms, *Biogeosciences*, *13*(14), 4291–4313, doi:10.5194/bg-13-4291-2016.
- Verbeeck, H., P. Peylin, C. Bacour, D. Bonal, K. Steppe, and P. Ciais (2011), Seasonal patterns of CO<sub>2</sub> fluxes in Amazon forests: Fusion of eddy covariance data and the ORCHIDEE model, *J. Geophys. Res.*, *116*(G2), 1–19, doi:10.1029/2010JG001544.
- Wei, Y. et al. (2014), The north american carbon program multi-scale synthesis and terrestrial model intercomparison project - Part 2: Environmental driver data, *Geosci. Model Dev.*, *7*(6), 2875–2893, doi:10.5194/gmd-7-2875-2014.
- Werth, D., and R. Avissar (2002), The local and global effects of Amazon deforestation David, *Geophys. Res. Lett.*, *107*(55), 1–7, doi:10.1029/2001JD000717.
- Williams, M., B. J. Bond, and M. G. Ryan (2001), Evaluating different soil and plant hydraulic constraints on tree function using a model and sap flow data from ponderosa pine, *Plant, Cell Environ.*, *24*(7), 679–690, doi:10.1046/j.1365-

3040.2001.00715.x.

Wilson, K. (2002), Energy balance closure at FLUXNET sites, *Agric. For. Meteorol.*, 113(1–4), 223–243, doi:10.1016/S0168-1923(02)00109-0.

5 Xu, X., D. Medvigy, J. S. Powers, J. M. Becknell, and K. Guan (2016), Diversity in plant hydraulic traits explains seasonal and inter-annual variations of vegetation dynamics in seasonally dry tropical ... Diversity in plant hydraulic traits explains seasonal and inter-annual variations of vegetation dynamics in seasonally, *New Phytol.*, 212(May), 80–95, doi:10.1111/nph.14009.

Zhang, K. et al. (2015), The fate of Amazonian ecosystems over the coming century arising from changes in climate, atmospheric CO<sub>2</sub> and land use, *Glob. Chang. Biol.*, 21(7), 2569–2587, doi:10.1111/gcb.12903.

#### 10 **Code availability**

The code of ORCHIDEE-CAN r2290 (Naudts et al., 2015) can be accessed from <http://dx.doi.org/10.14768/06337394-73A9-407C-9997-0E380DAC5595>
